# Supplementary material for: Novel Hybrid Hypercrosslinked Polymer Assisted Highly Efficient Thermal Energy Storage
Source: Research Square preprint supplement (doi:10.21203/rs.3.rs-152851/v1), 2021-01-22
Supplement: Supplementary file 1 [file d895ca0574013d28bae6fc13.docx]

**Novel Hybrid Hypercrosslinked Polymer Assisted Highly Efficient Thermal Energy Storage**

Changhui Liu,* Jiahao Zhang, Jian Liu, Zengyi Tan, Yuqi Cao, Xia Li, Zhonghao Rao*

(School of Electrical and Power Engineering, China University of Mining and Technology, Xuzhou, Jiangsu 221116, China)

(Email: liuch915@cumt.edu.com, raozhonghao@cumt.edu.cn)

**Note 1: Calculation method of different molar ratios of polymers.**

The molar ratio of the prepared monomer of the hybrid polymer can be known from the hydrogen spectrum, Eq. (S1) was used to calculate the value of x,

Eq. (S1)

where x is the number of benzene rings, Integration 1 represents the hydrogen atoms in benzene rings, Integration 2 is hydrogen atoms of silioxyl group.

**Note 2: Calculation method of the Light-to-thermal conversion efficiency.**

Light-to-thermal conversion efficiency (η) of HP/CB-PCMs was estimated according to the ratio of heat stored in the composite with respect to the light energy stored by sample during the phase change process. By referring literatures 1, Eq. (S2) was used to calculate the value of η,

(Eq. S2)

where m is the mass of the HP/CB-PCMs composite, △H represents the phase change enthalpy obtained from DSC result, ρ is intensity of the simulant light source, tf and ts are the light driven phase change time of the sample before and after phase change, respectively.

| **m/g** | **S/cm2** | **tf- ts/s** | **ρ/mW.cm-2** | **η** |
| --- | --- | --- | --- | --- |
| **3** | **7.065** | **362** | **110** | **93.7%** |

**Fig. S1 1H NMR spectra of polymers with different mole ratios.**

**(a) The monomer molar ratio of polymer is 9:1.**


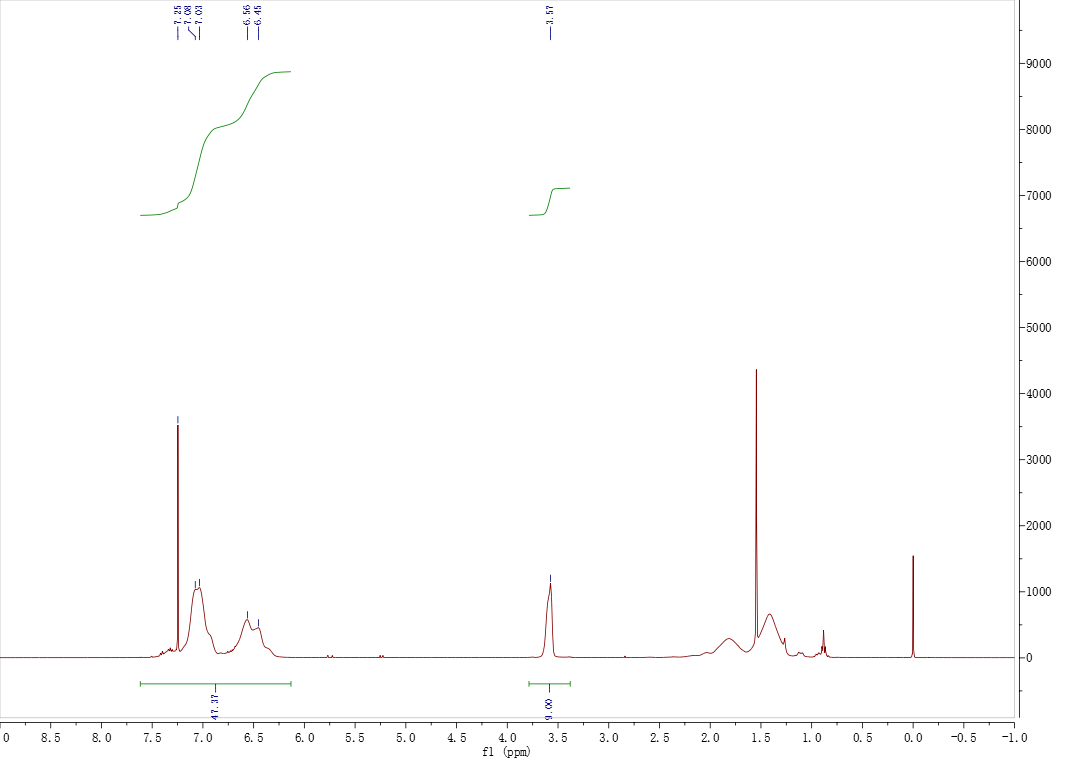


X=0.1

**(b) The monomer molar ratio of polymer is 8.5:1.5.**


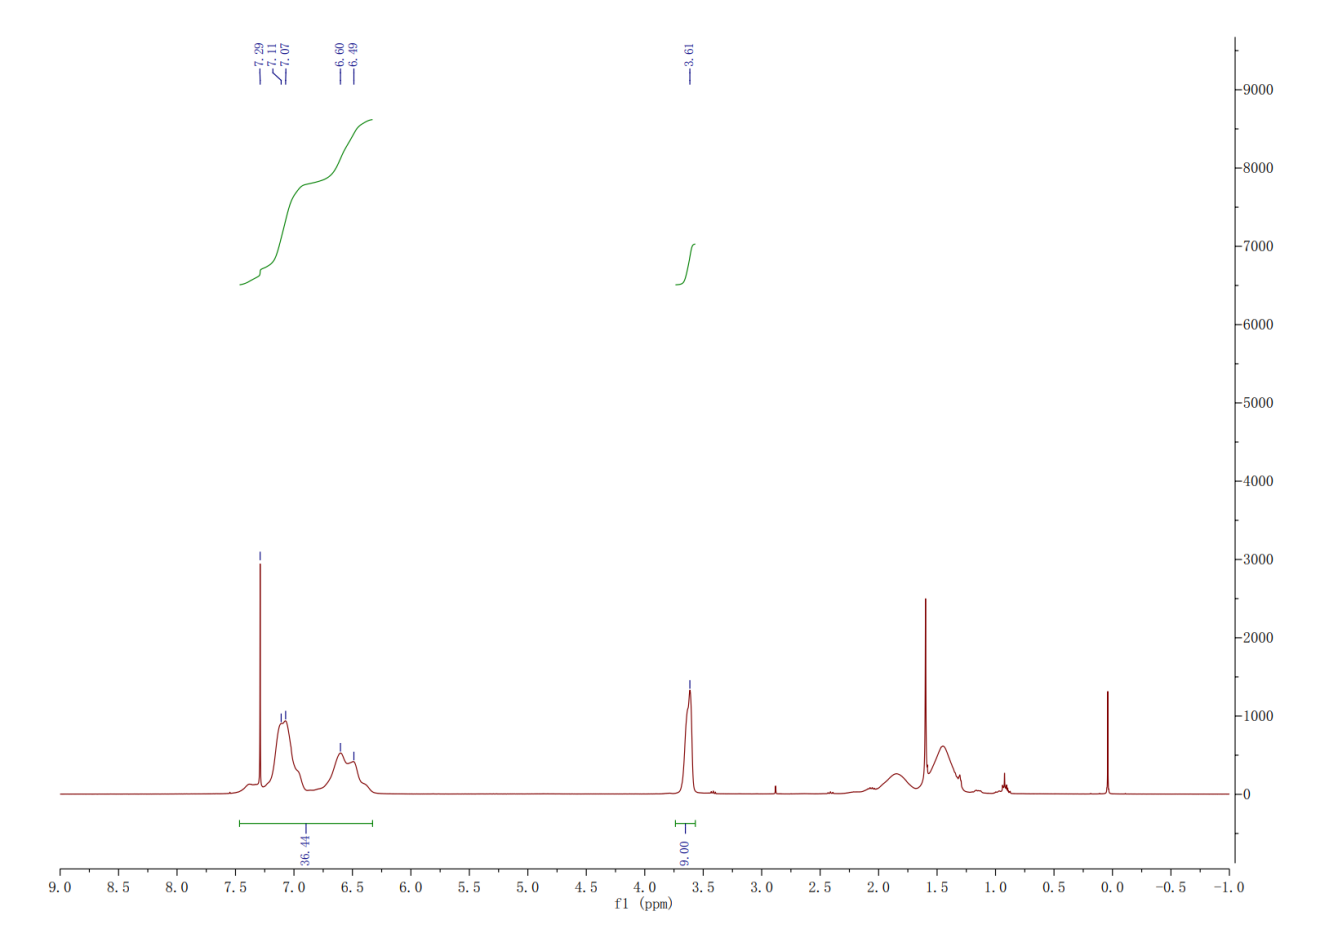


X=0.15**(c) The monomer molar ratio of polymer is 8:2.**


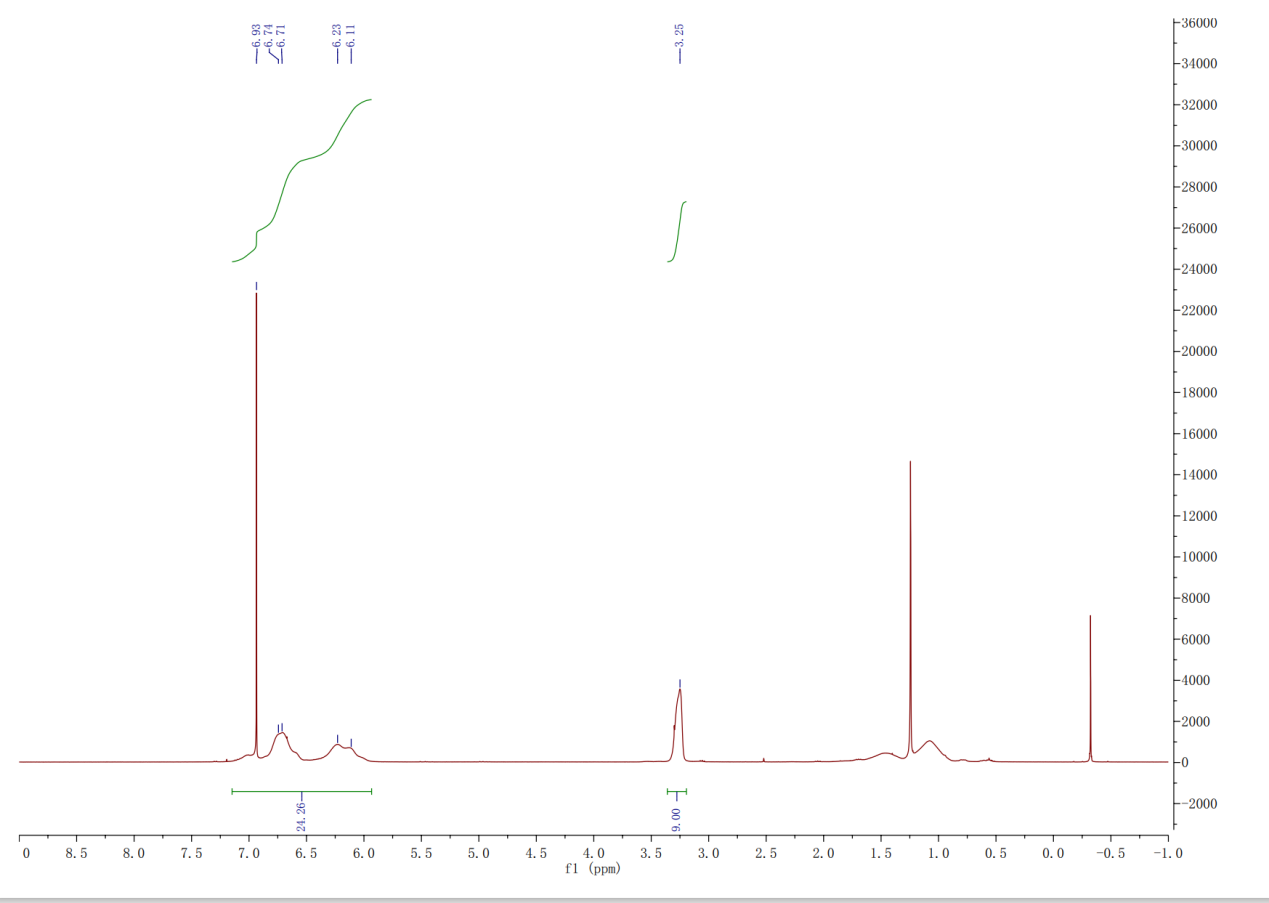


X=0.2

**(d) The monomer molar ratio of polymer is 7.5:2.5.**


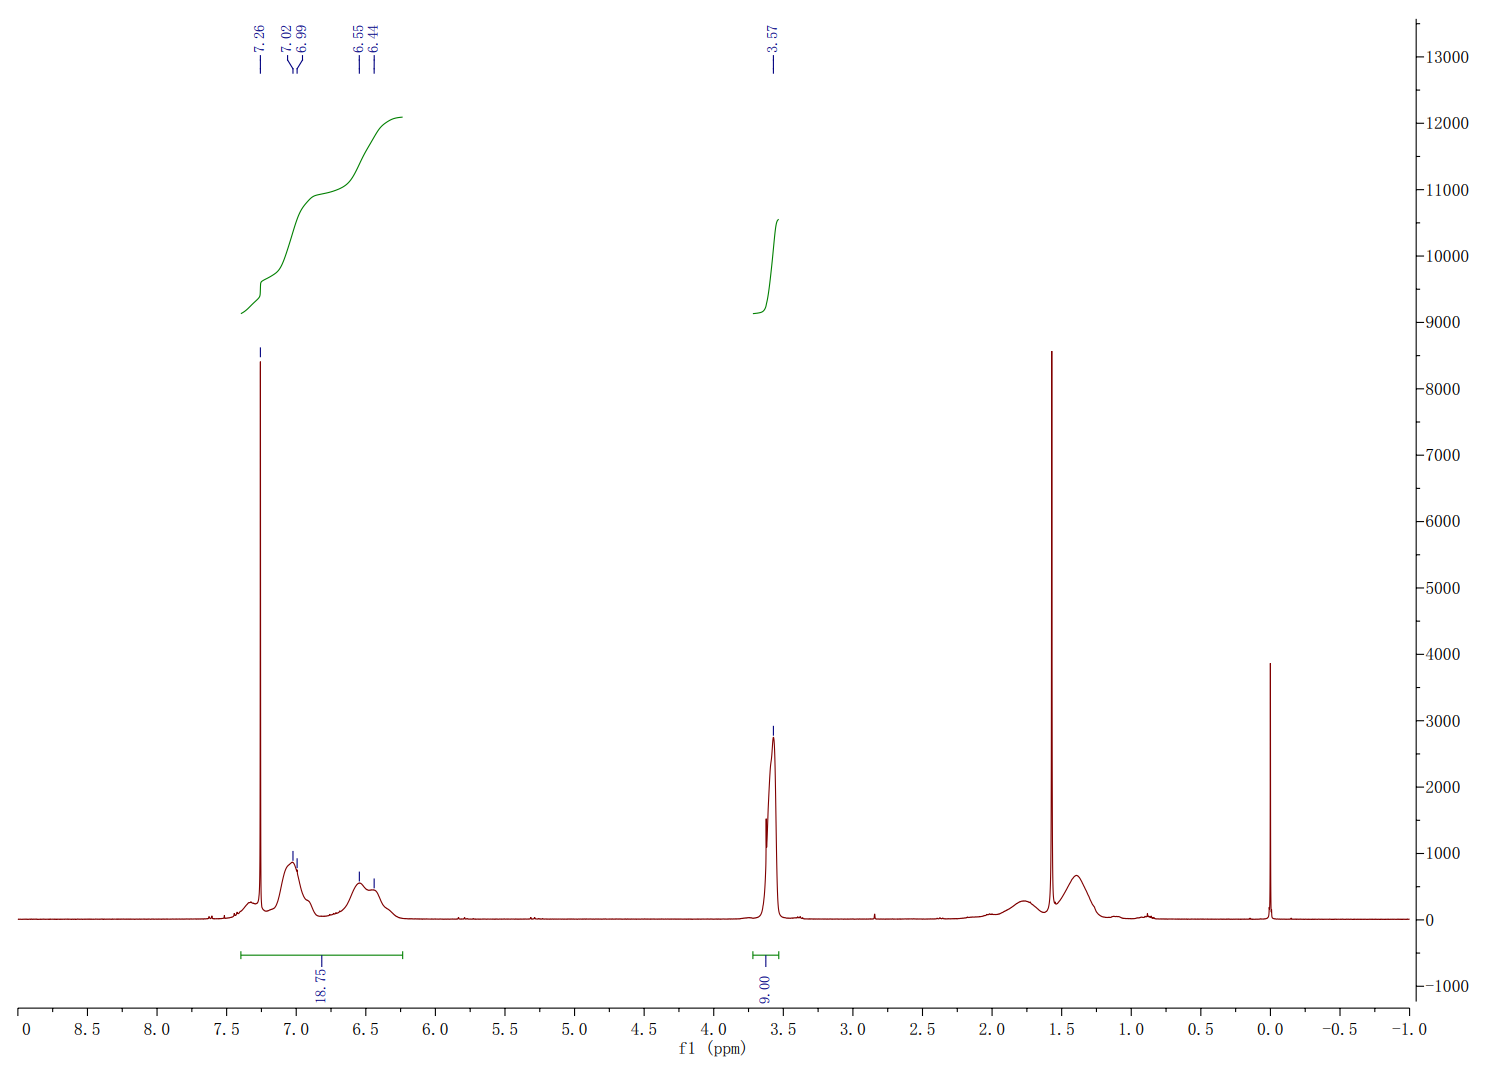


X=0.25

**(e) The monomer molar ratio of polymer is 7:3.**


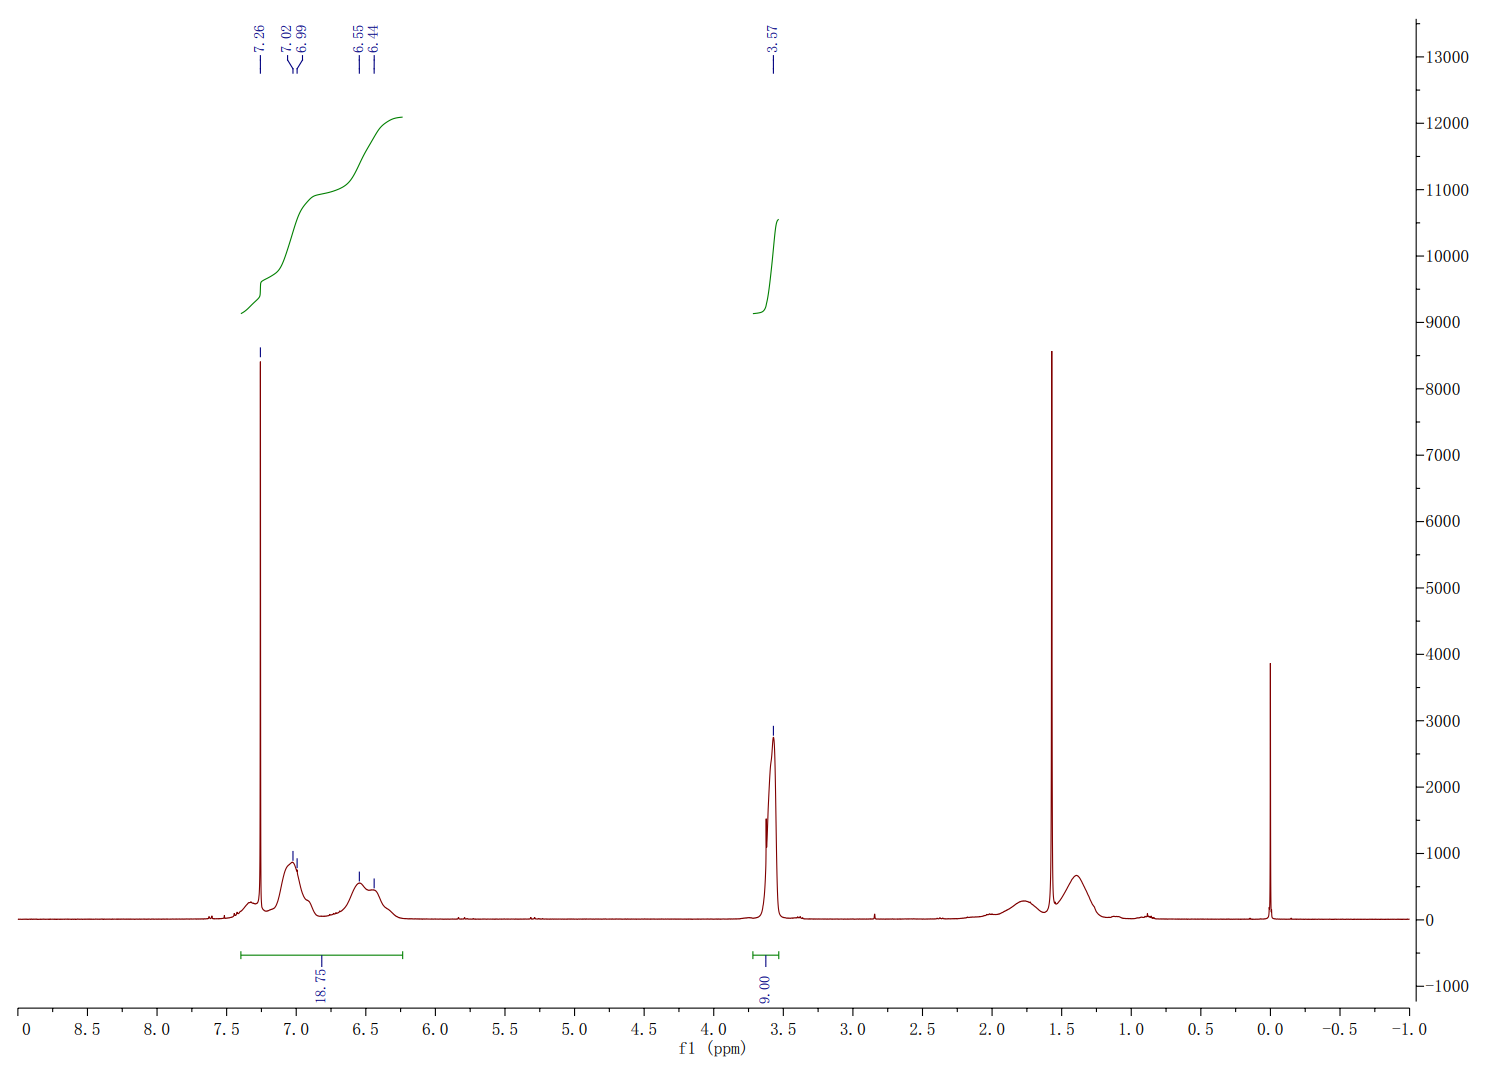


X=0.3

**(f) The monomer molar ratio of polymer is 6:4.**


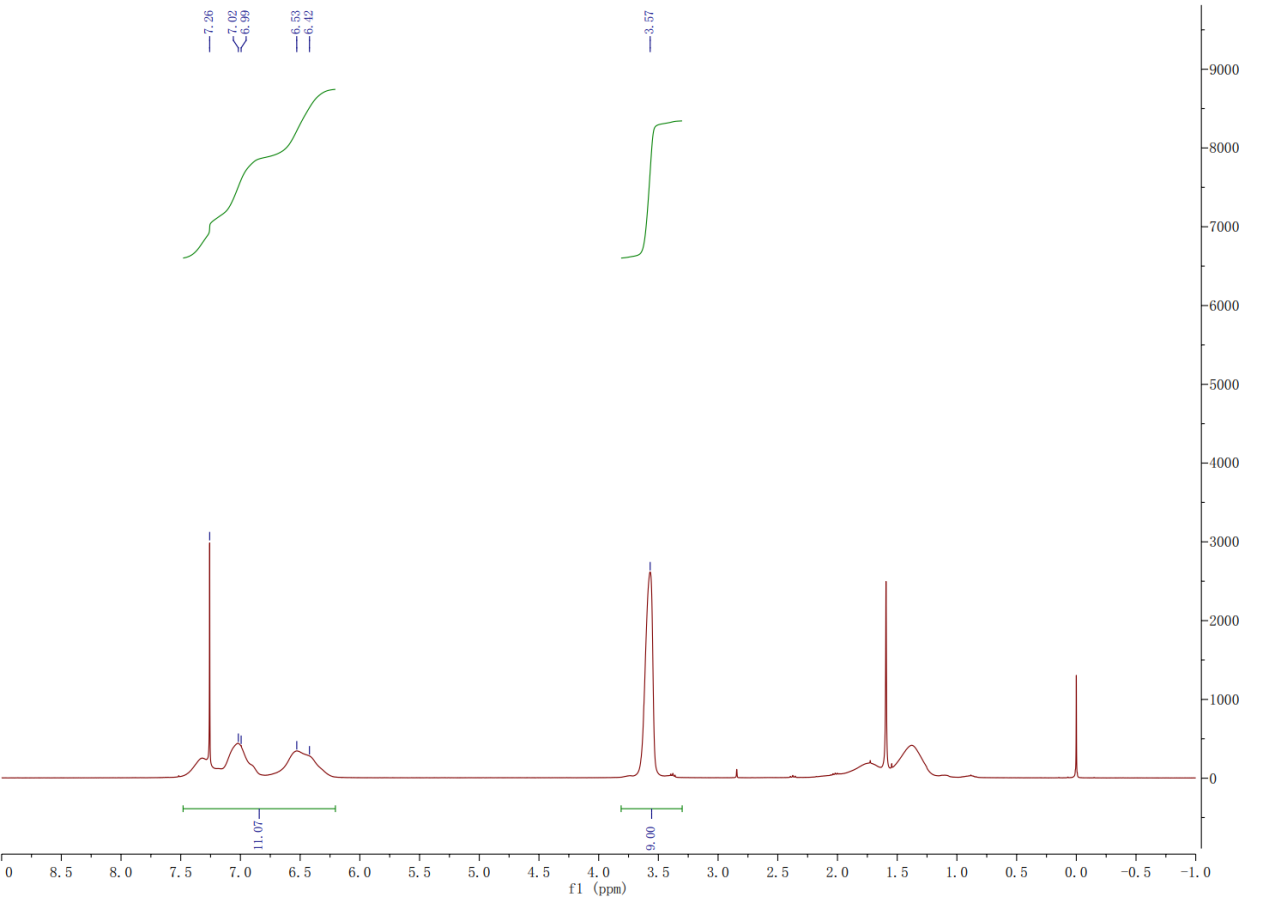


X=0.4

**(g) The monomer molar ratio of polymer is 5:5.**


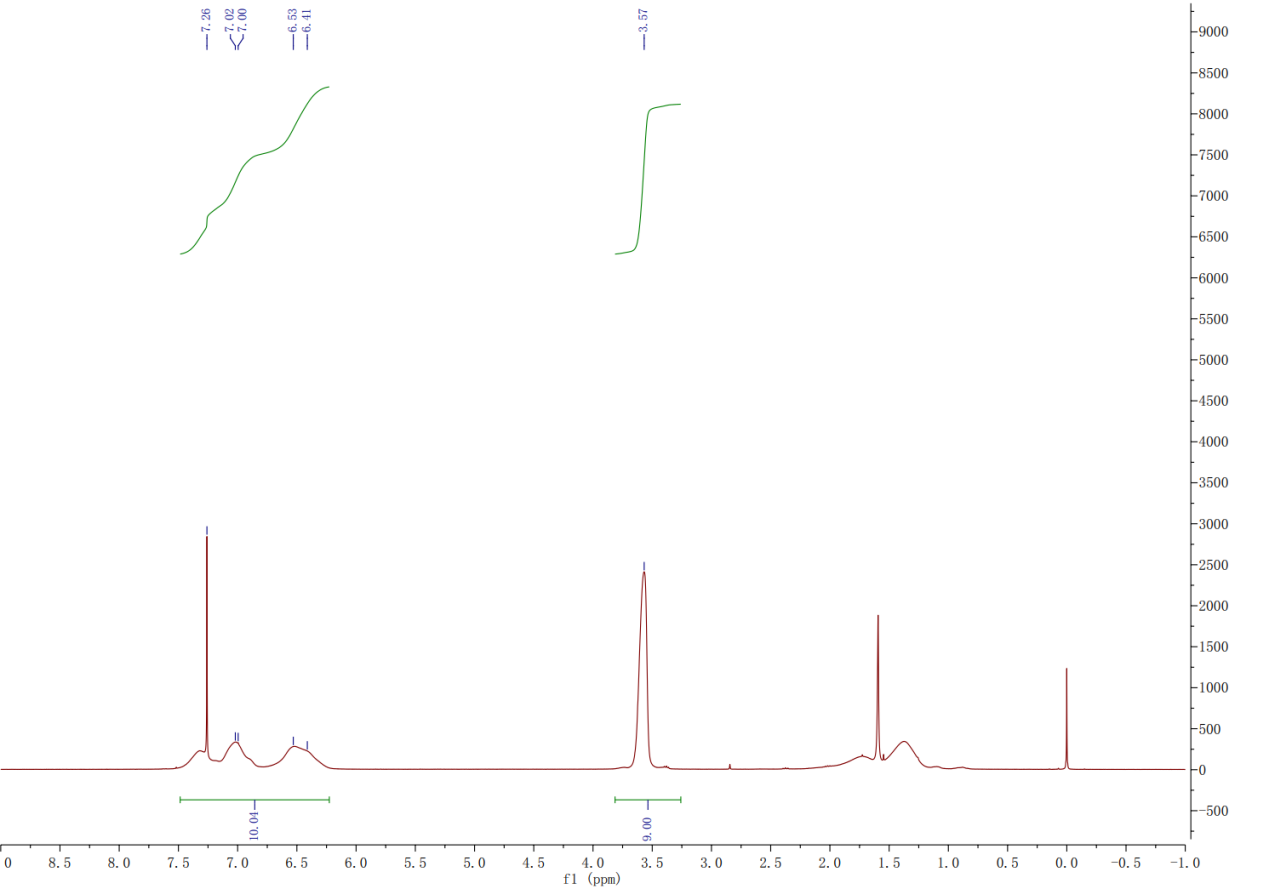


X=0.5

**Fig. S2 (a) Proposed mechanism for the formation of polymer, schematic illustration of the materials preparation process of (b) polymer, (c) HP/CB-PCMs.**

(a)

**
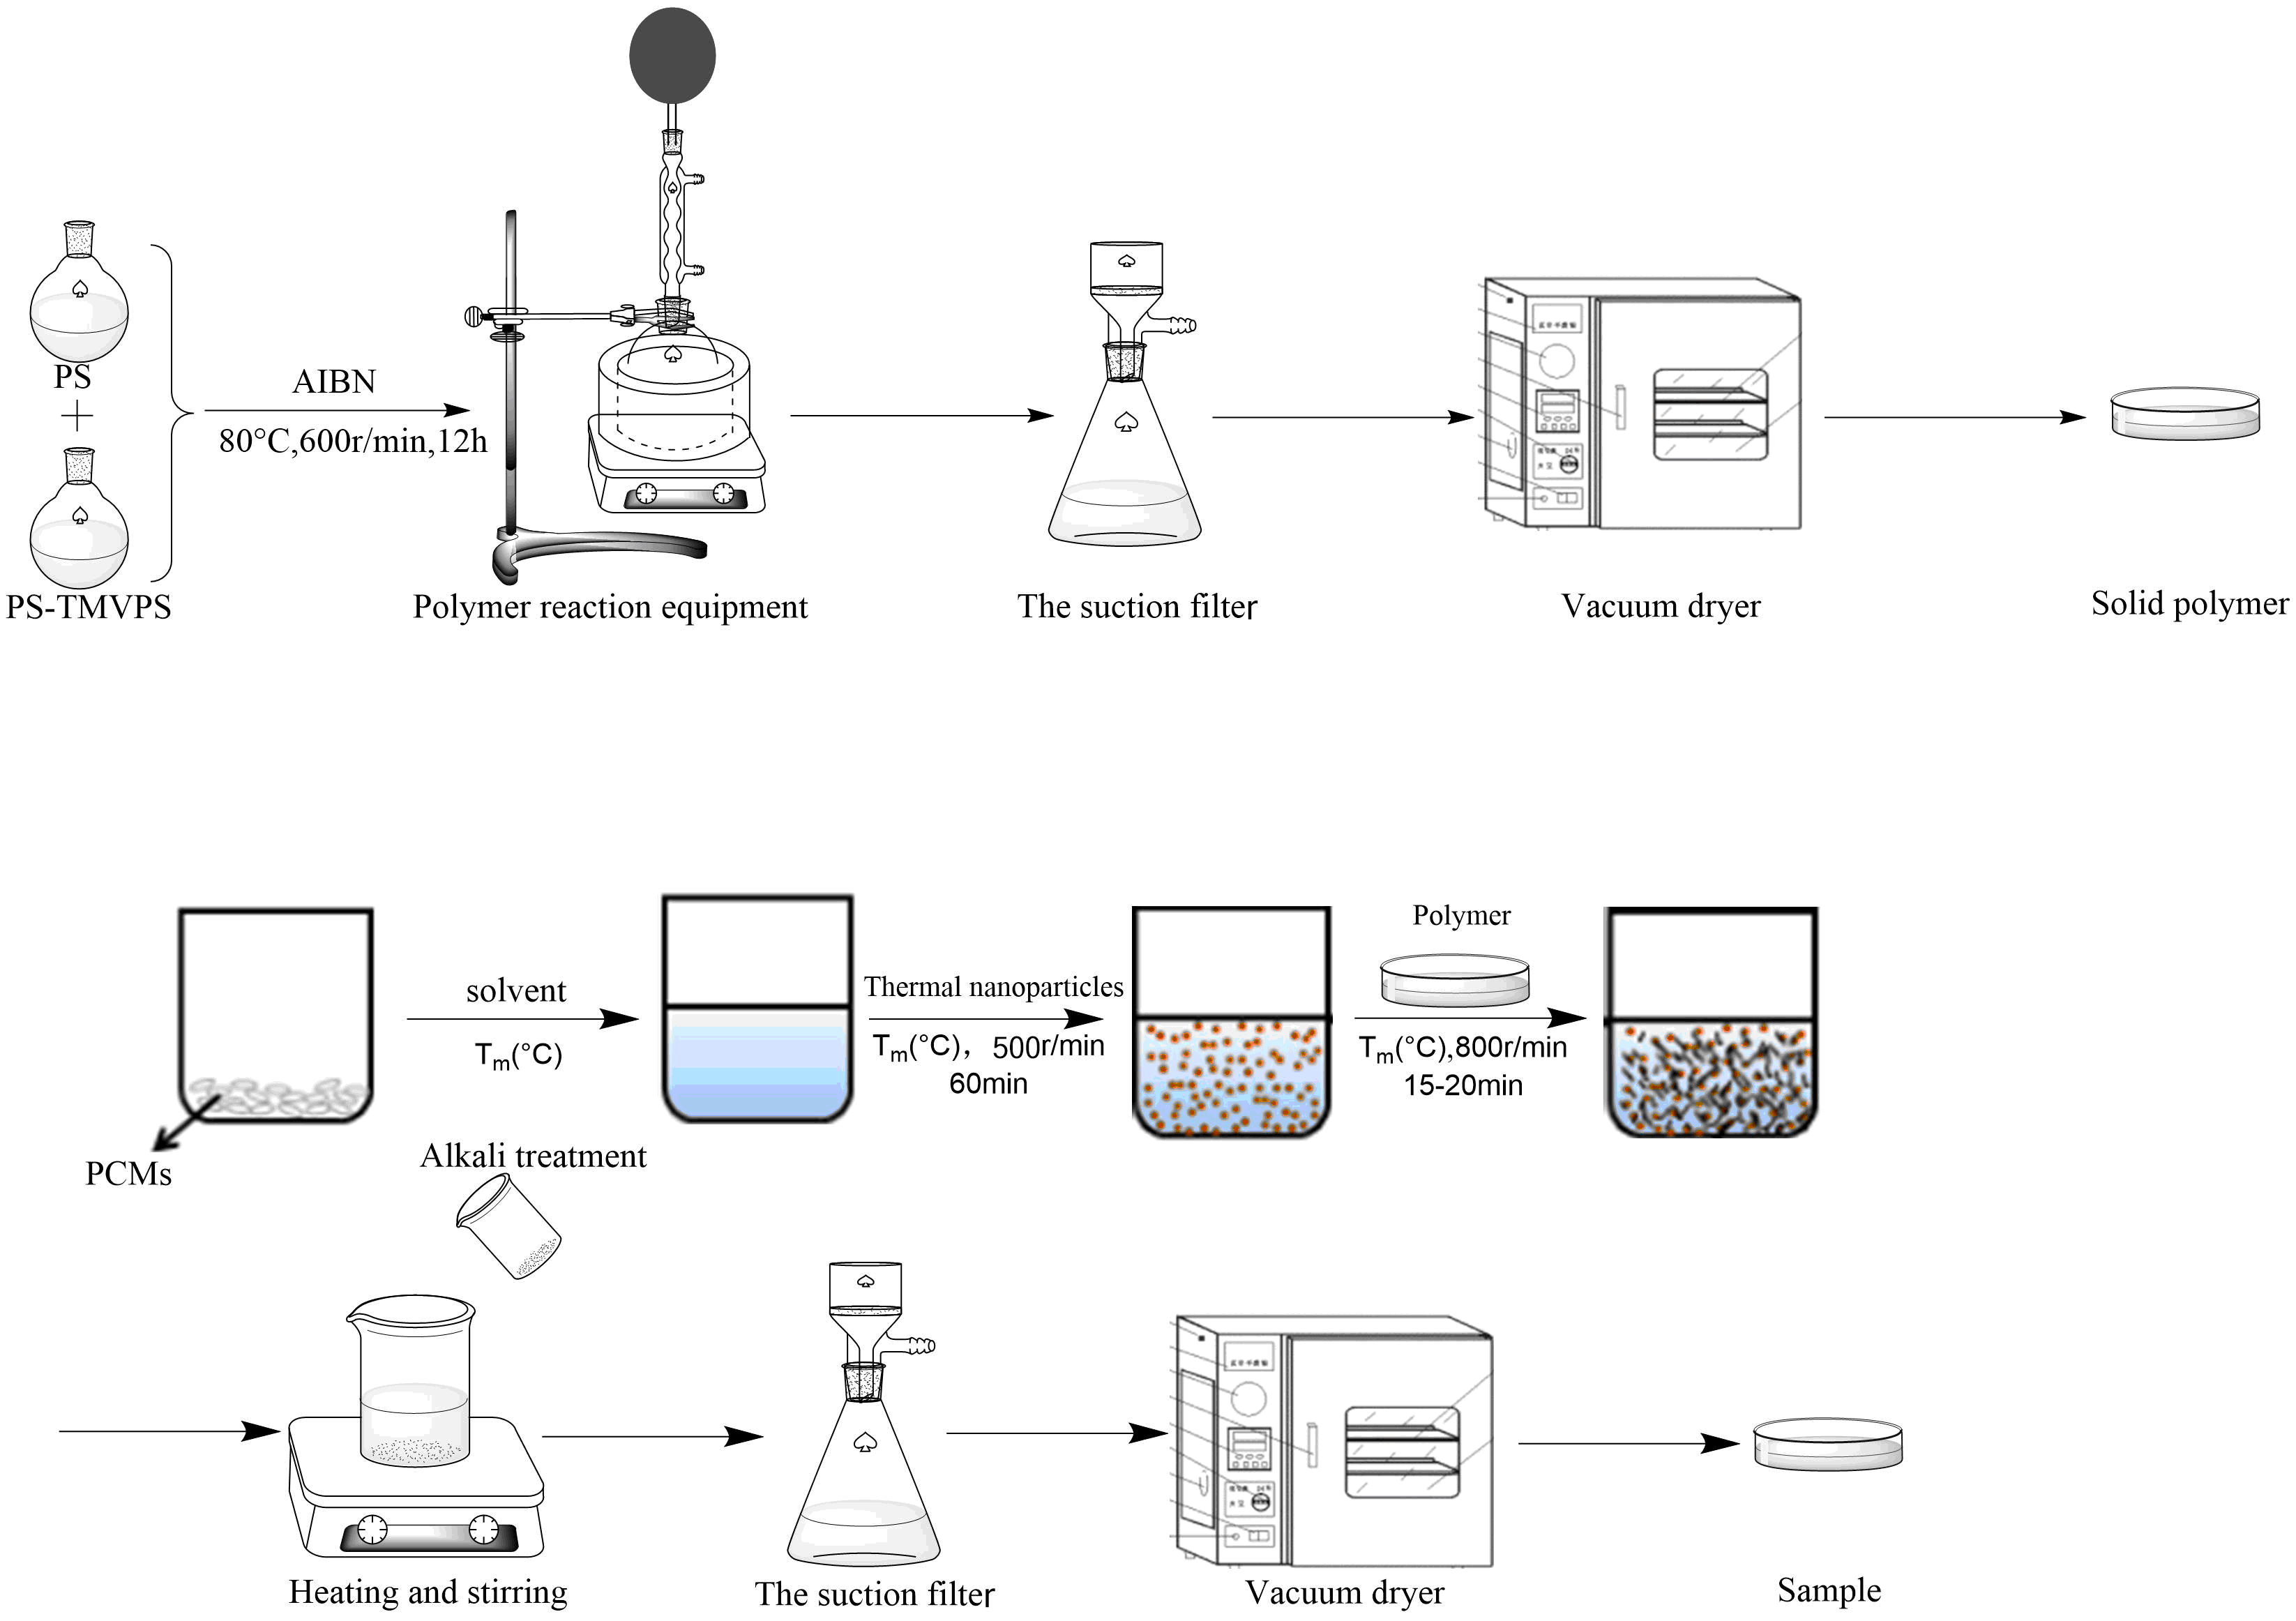
**

(b)

(c)

**Fig. S3 Leakage testing of different HP/CB-OPCMs composite.**


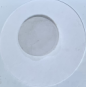

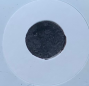

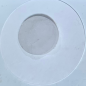

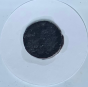

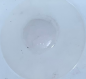

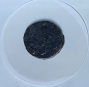

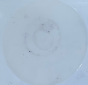

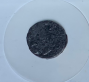

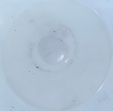

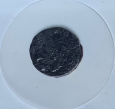

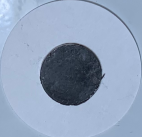

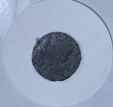

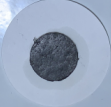

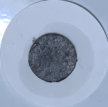

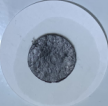

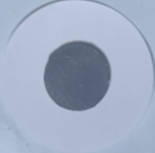

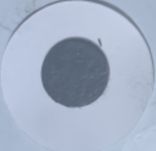

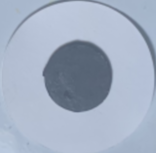

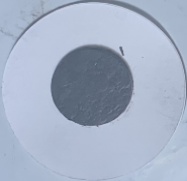

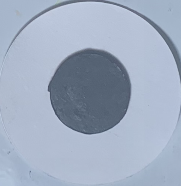

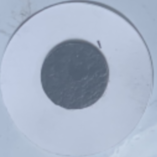

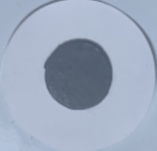

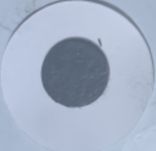

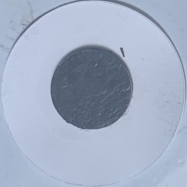

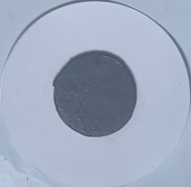

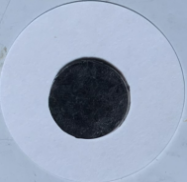

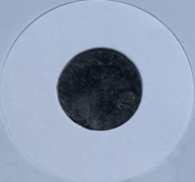

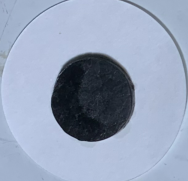

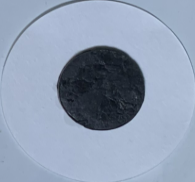

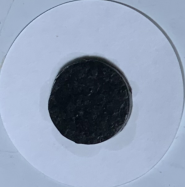

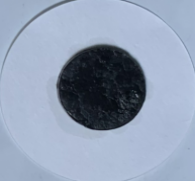

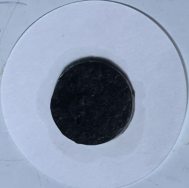

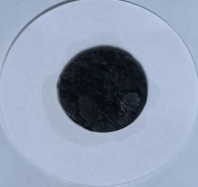

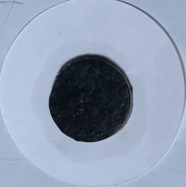

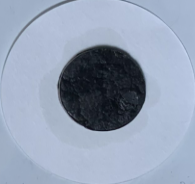

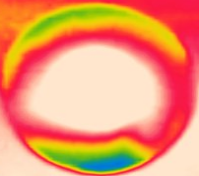

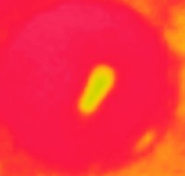

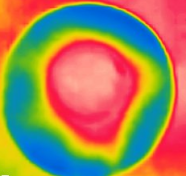

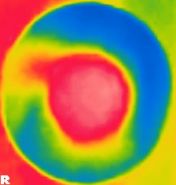

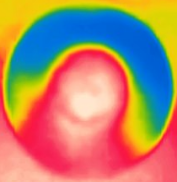

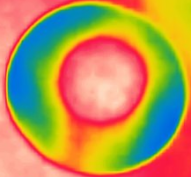

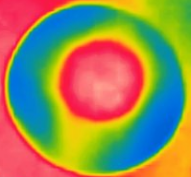


CB-OPCMs

80°C, 20min

Paraffin wax

80°C, 5min

80°C, 10min

80°C, 15min

HP/CB-OPCMs(5:5)

HP/CB-OPCMs(6:4)

HP/CB-OPCMs(7:3)

HP/CB-OPCMs(8:2)

HP/CB-OPCMs(9:1)

Infrared image

**Fig. S4 SEM images of (a)** **HP/CB-OPCMs (9:1), (b) HP/CB-OPCMs (8:2), (c) HP/CB-OPCMs (7:3), (d) HP/CB-OPCMs (6:4), (e) HP/CB-OPCMs (5:5).**

(a)

(b)

**
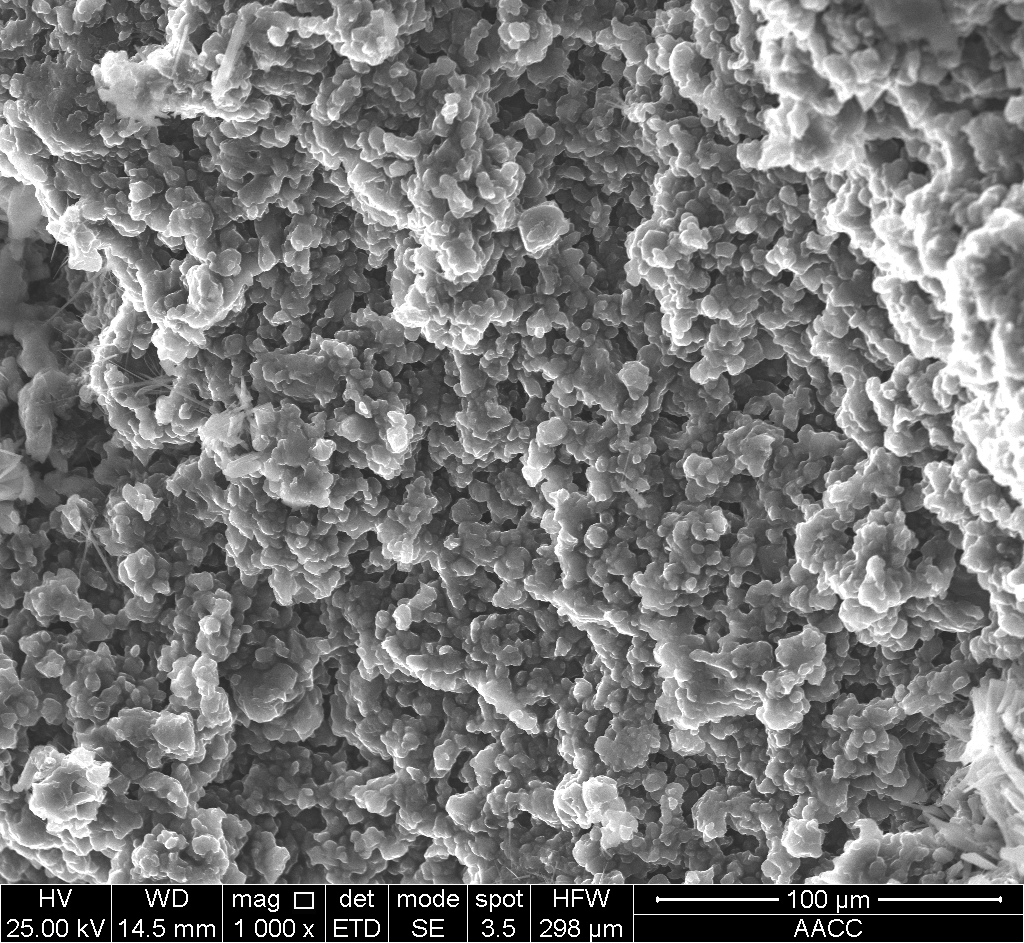

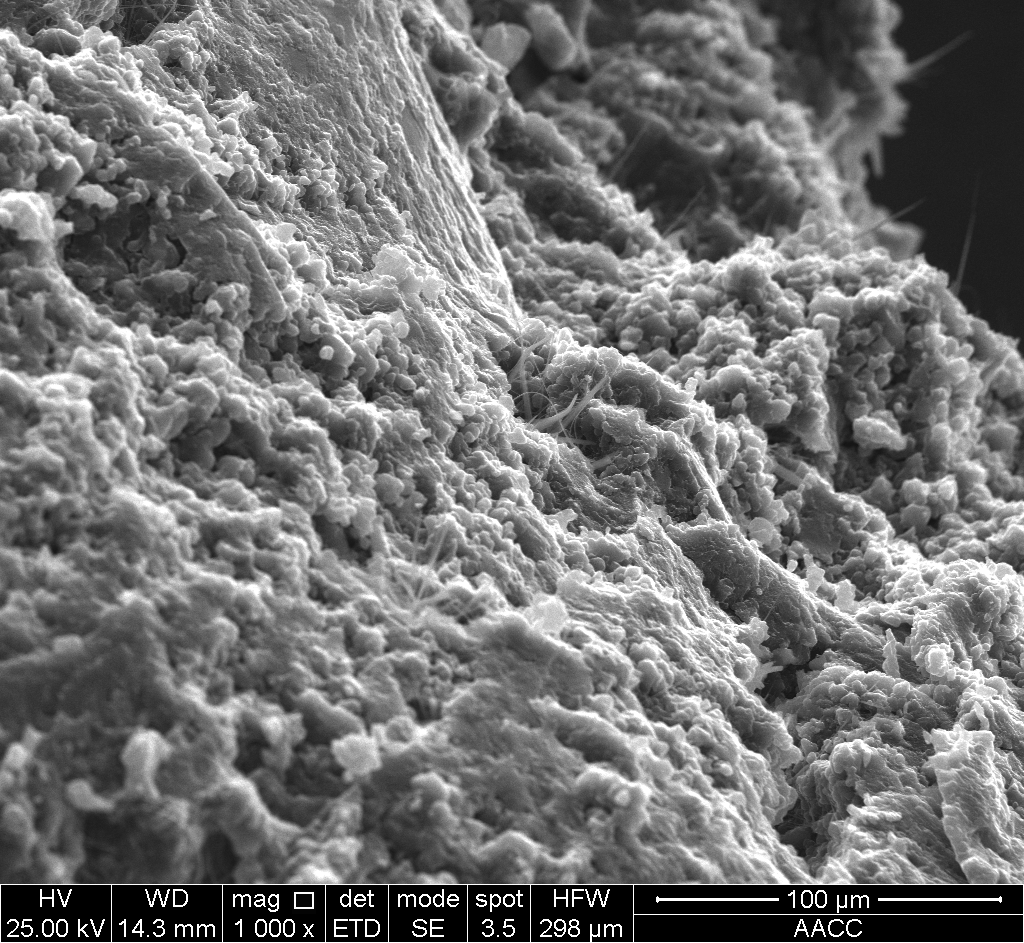

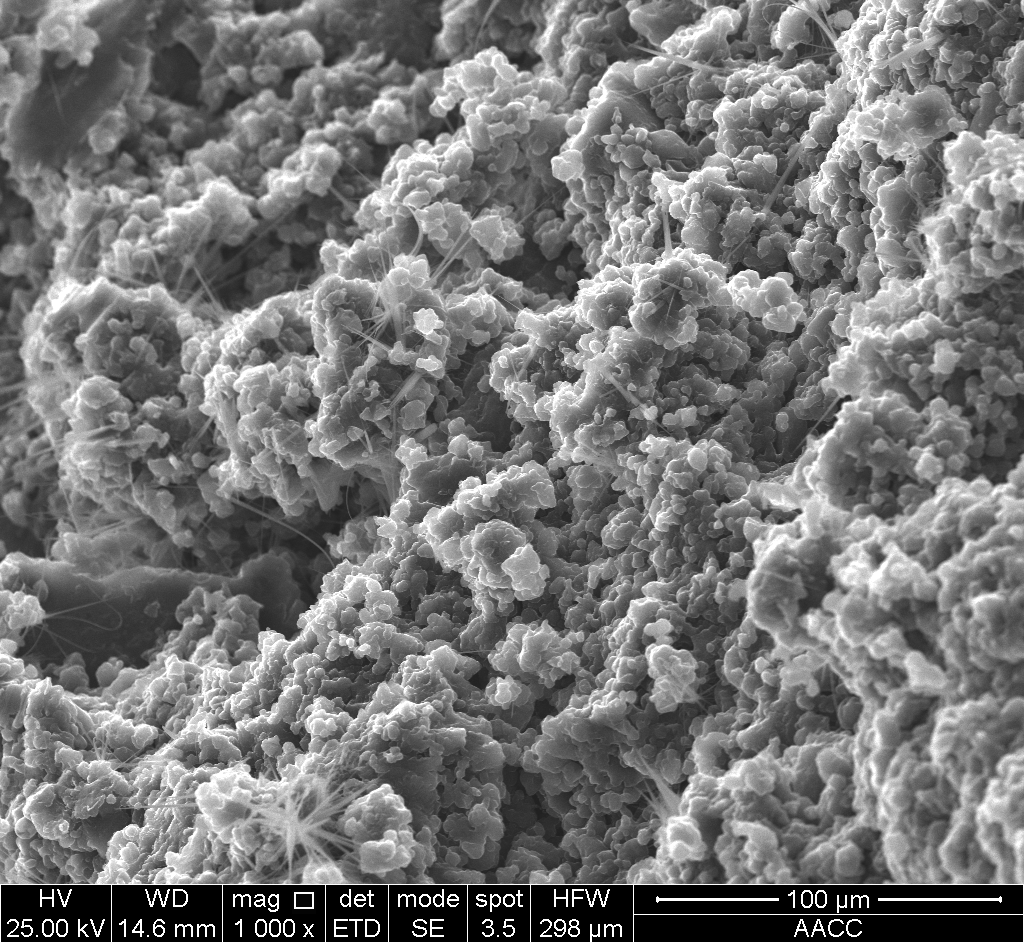

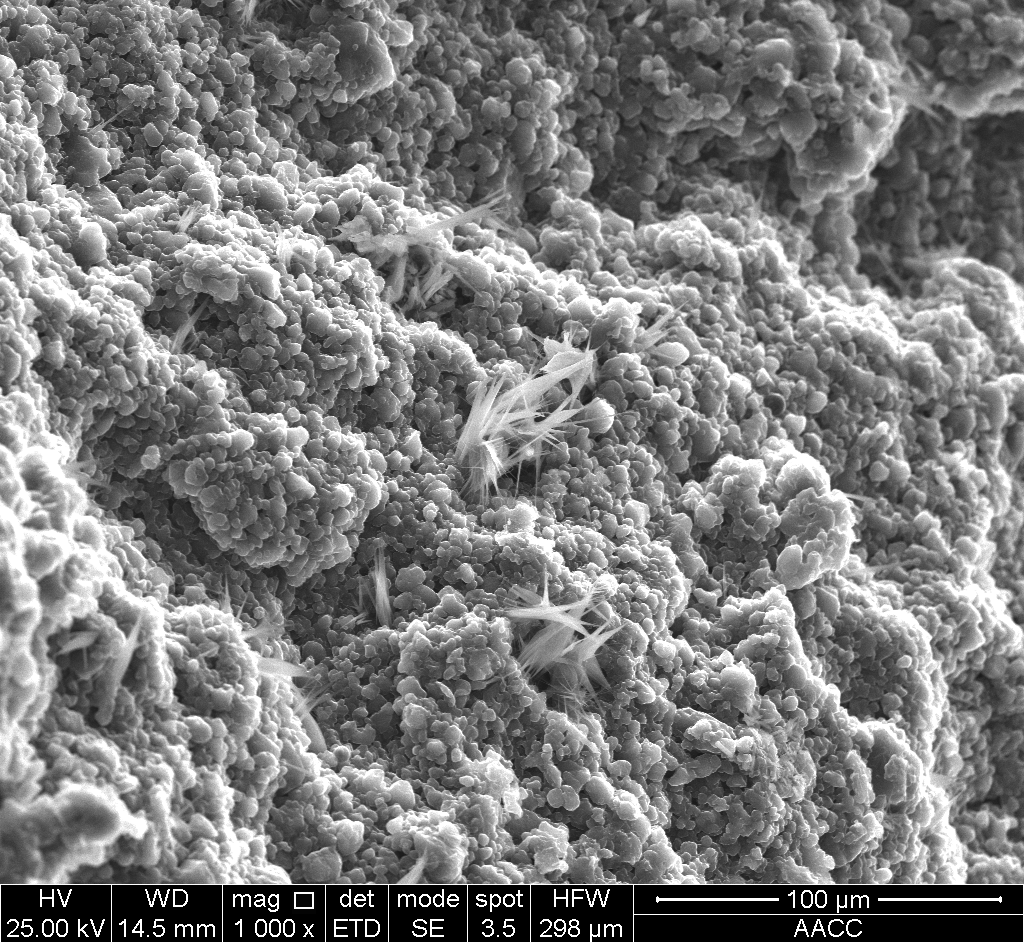
**

(d)

(e)

(c)

**100 μm**

**100 μm**

**100 μm**

**100 μm**

**
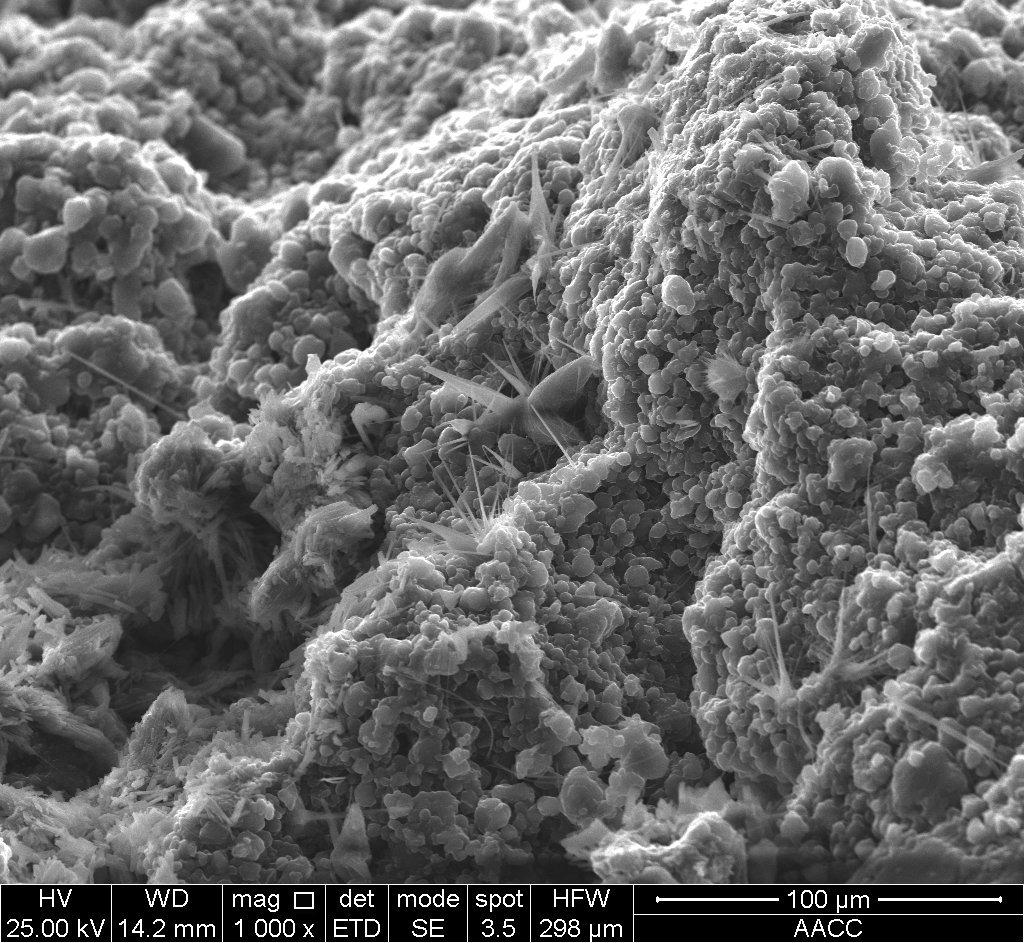
**

**100 μm**

**Fig. S5 DSC curves of HP/CB-OPCMs composites with different monomer. (a) HP/CB-OPCMs (9:1); (b) HP/CB-OPCMs (8:2); (c) HP/CB-OPCMs (7:3); (d) HP/CB-OPCMs (6:4); (e) HP/CB-OPCMs (5:5).**

(b)

(a)

(d)

(c)

(e)

**Fig. S6 DSC curves of HP/CB-PCMs inorganinc composites with different monomer. (a) HP/CB-PCMs (9:1); (b) HP/CB-PCMs (8.5:1.5); (c) HP/CB-PCMs (8:2); (d) HP/CB-PCMs (7.5:2.5); (e) HP/CB-PCMs (7:3).**

(a)

(d)

(c)

(b)

(e)

**Fig. S7 SEM images of (a) HP/CB-IPCMs (9:1), (b) HP/CB-IPCMs (8.5:1.5), (c) HP/CB-IPCMs (8:2), (d) HP/CB-IPCMs (7.5:2.5), (e) HP/CB-IPCMs (7:3).**

(b)

(a)


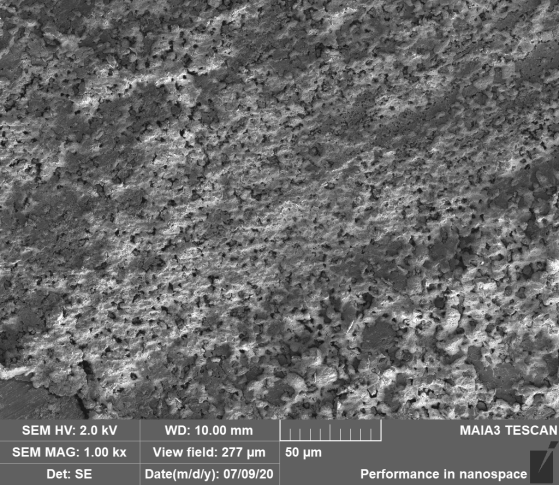

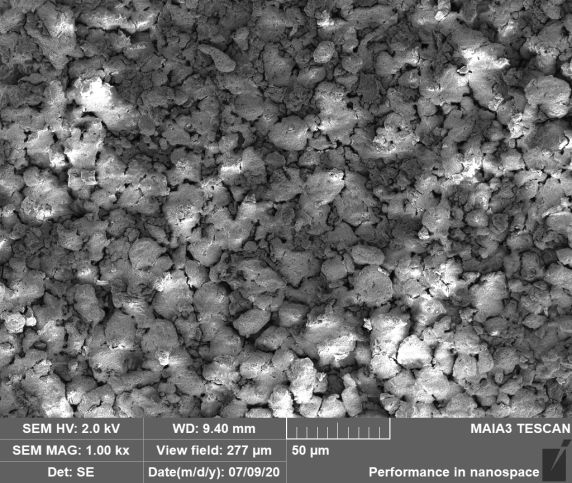

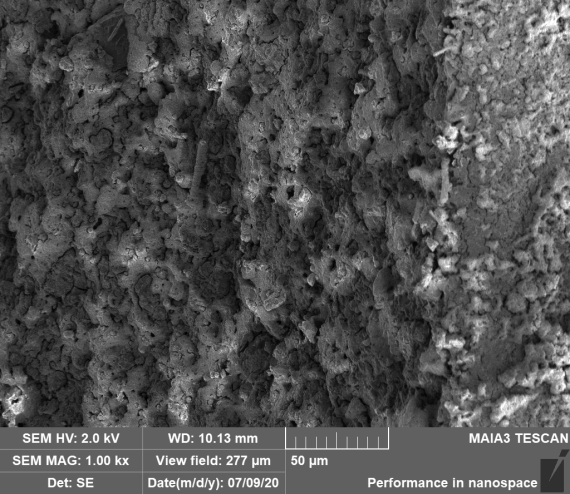

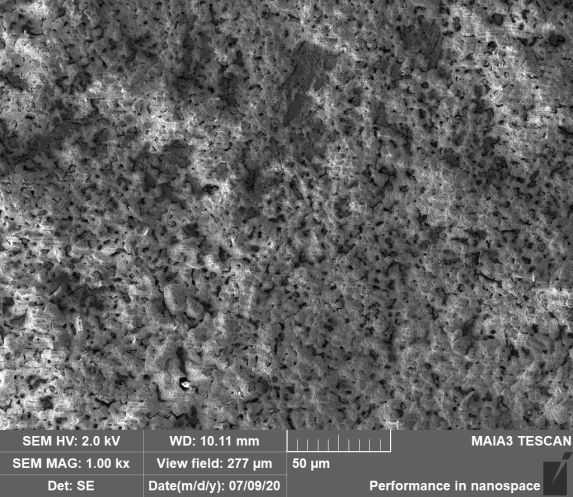

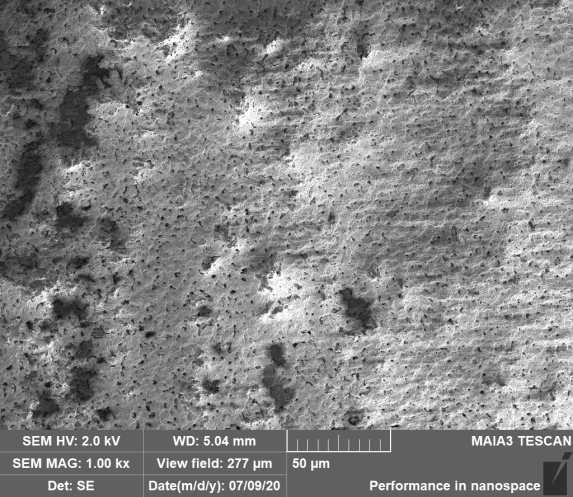


(e)

(c)

(d)

**100 μm**

**100 μm**

**100 μm**

**100 μm**

**100 μm**

**Fig. S8 Leakage testing of different HP/CB-IPCMs composite.**

**
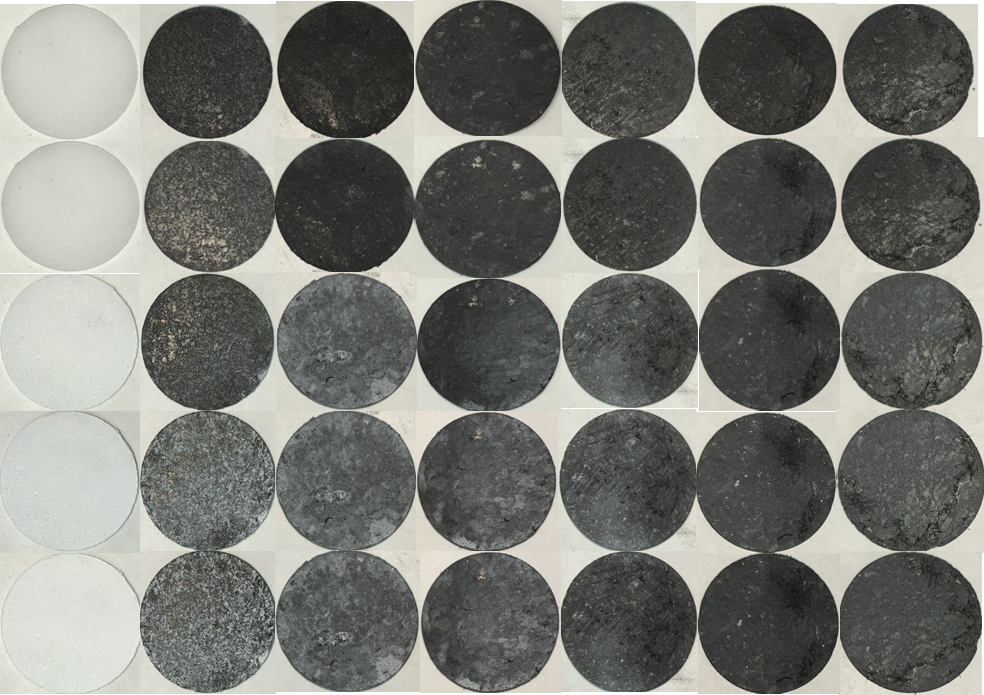
**

65°C,15min

65°C,10min

65°C,5min

65°C,2min

SAT

HP/CB-IPCMs(7:3)

HP/CB-IPCMs(7.5:2.5)

HP/CB-IPCMs(8:2)

HP/CB-IPCMs(8.5:1.5)

HP/CB-IPCMs(9:1)

CB-IPCMs

**Fig. S9 (a) Photograph of light-to-thermal energy conversion and storage measuring platform; (b) photograph of Contact Angle test platform and (c) photograph of the thermal energy storage and release tests.**

(a)


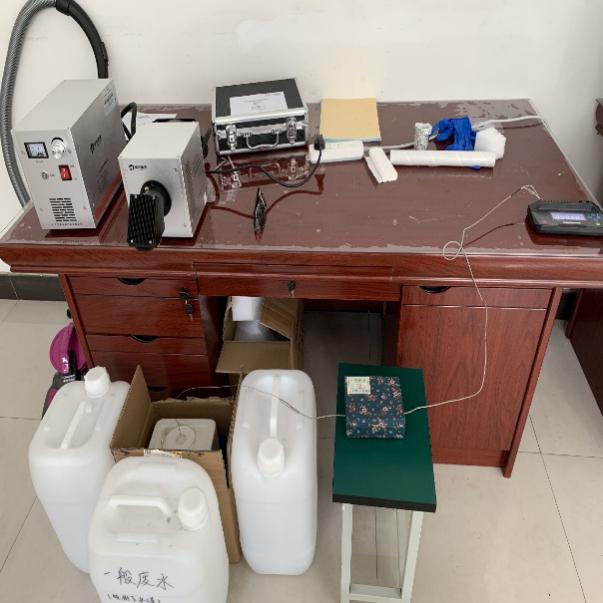

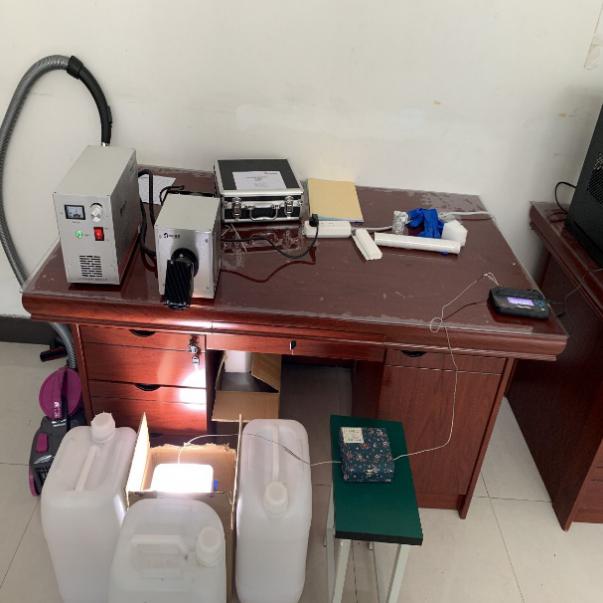

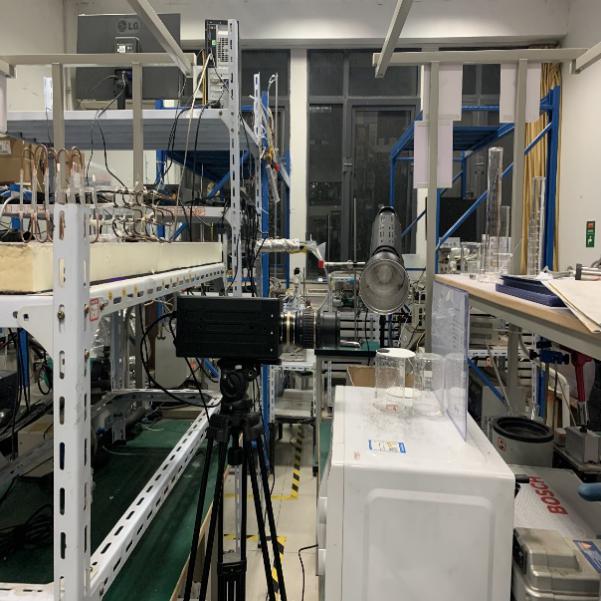

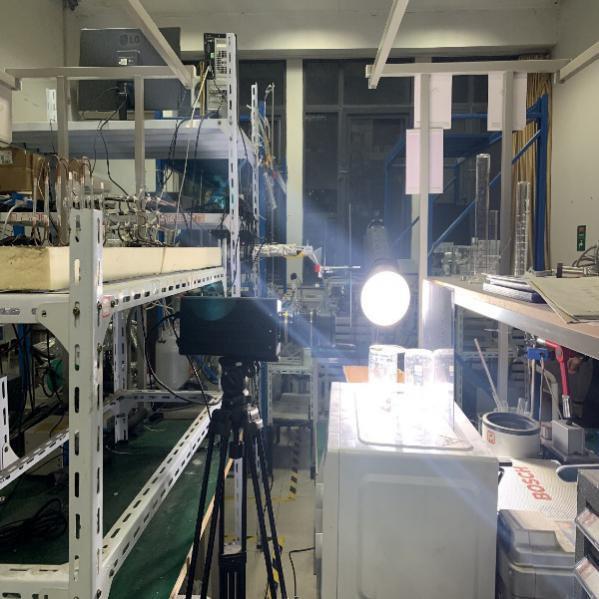

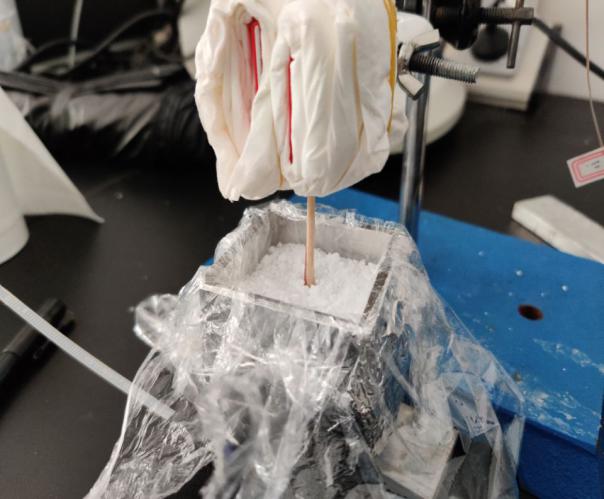


Heat storage unit

Laboratory spotlight

Date analyzer unit

High speed camera

Sample Foam box

Simulant light source

(c)

(b)

**Fig. S10 Verification test of hypercrosslinked reaction of hybrid polymer, (a) Comparison diagram of polymer crosslinking with different monomer proportions. (b) General diagram of verification of all samples;**

(a)


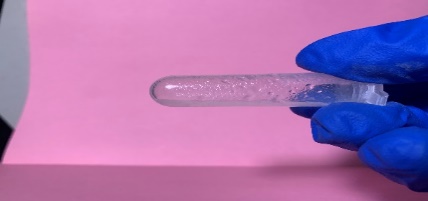


(b)

HP (5:5)

HP (5:5)

HP (6:4)

HP (6:4)

HP (7:3)

HP (7:3)

HP (7.5:2.5)

HP (7.5:2.5)

HP (8:2)

HP (8:2)

HP (8.5:1.5)

HP (8.5:1.5)

HP (9:1)

HP (9:1)


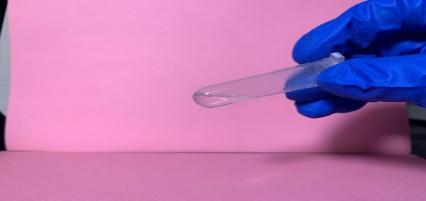

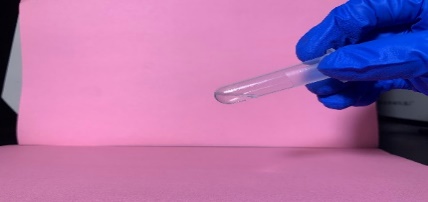

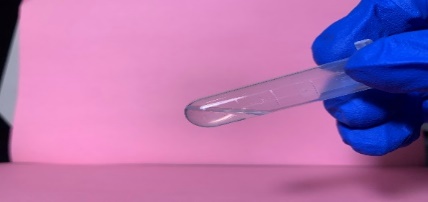

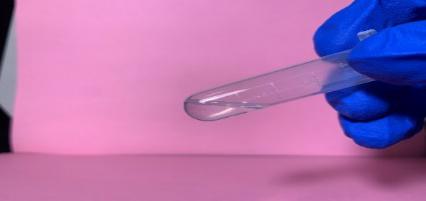

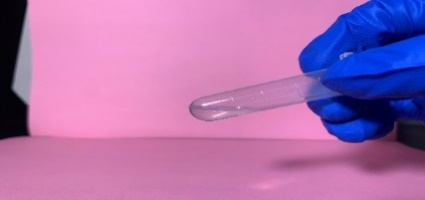

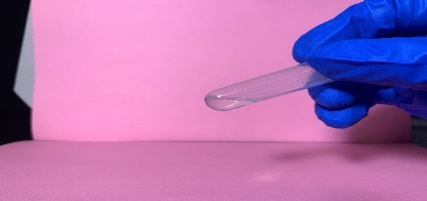

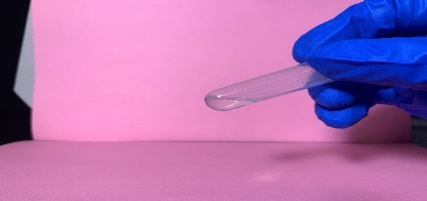

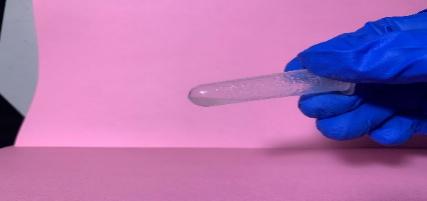

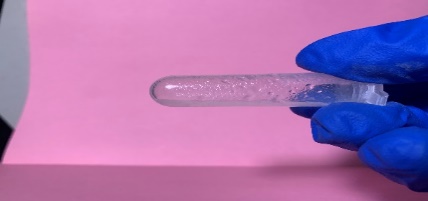

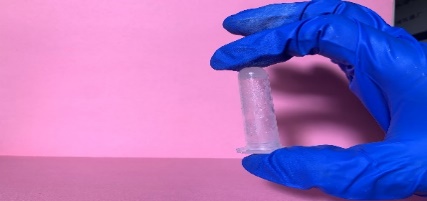

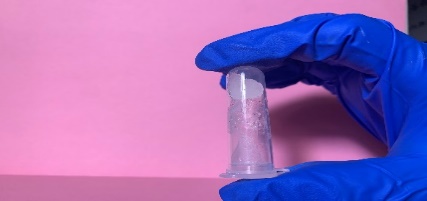

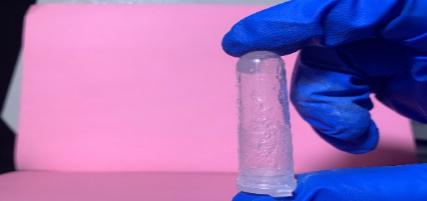

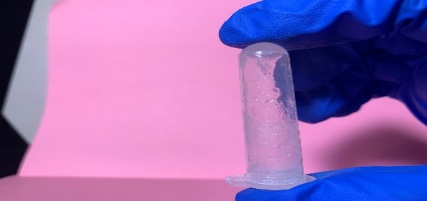


**alkali** **treatment**

**80°C,30s**


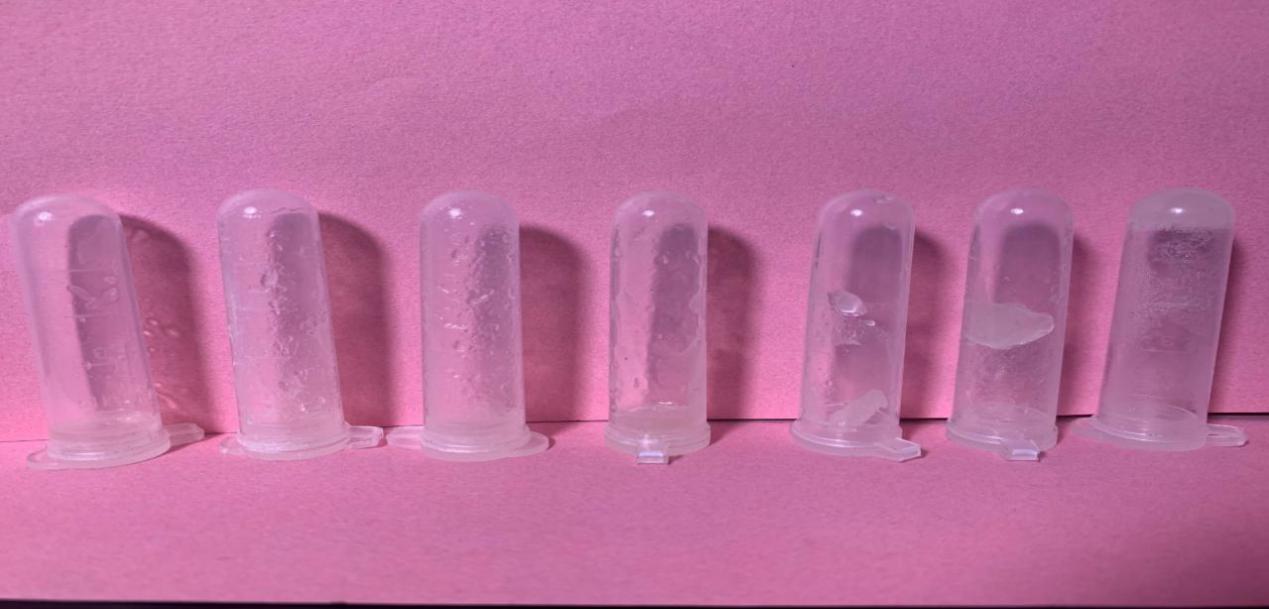


HP (8:2)

HP (9:1)

HP (8.5:1.5)

(b)

HP (5:5)

HP (6:4)

HP (7:3)

HP (7.5:2.5)

**Fig. S11 Schematic diagram of the supercooling degree test.**

Supercooling test platform

80-20°C

Data collector unit

Data analyzer unit


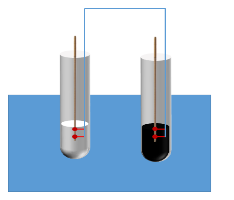


**Table S1 Comparison of research work between different scholars.**

| **name** | **Thermal conductivity(W (m-1 K-1))** | **Photothermal conversion efficiency(%)** | **Journal** | **Year** |
| --- | --- | --- | --- | --- |
| **Yang′s work1** | **10.54** | **95** | **Applied Thermal Engineering** | **2019** |
| **Liu′s work2** | **3.7** | **93** | **International Journal of Heat and Mass Transfer** | **2019** |
| **Liu′s work3** | **55.37** | **93.8** | **Journal of Materials Chemistry A** | **2020** |
| **Mishra′s work4** | **0.55** | **68** | **Energy** | **2020** |
| **Du′s work5** | **0.448** | **87.6** | **Cellulose** | **2020** |
| **Zhang′s work6** | **0.414** | **88.7** | **Applied Energy** | **2018** |
| **Du′s work7** | **0.421** | **89.3** | **Acs Sustainable Chemistry & Engineering** | **2019** |
| **Yang′s work8** | **0.54** | **81** | **International Journal of Energy Research** | **2020** |

**Table S2 Parameters of paraffin and carbon black composites.**

| **CB(g)-OPCMs(g)a** | **Sample quality before leakage quality(g)** | **Sample quality after leakage quality(g)** | **Leakage rate(%)** | **Timeb(min)** |
| --- | --- | --- | --- | --- |
| 2-5 | 3.0150 | 2.3109 | 23 | 23 |
| 2.5-5 | 2.9992 | 2.6455 | 11.70 | 23 |
| 3-5 | 3.0203 | 2.7330 | 9.50 | 23 |
| 3.5-5 | 3.0394 | 2.7624 | 9.10 | 23 |
| 4-5 | 3.0094 | 2.8186 | 6.30 | 23 |
| 4.5-5 | 2.9416 | 2.7624 | 6.10 | 23 |
| 5-5 | 3.024 | 2.829 | 6.40 | 23 |
| 6-5 | 3.022 | 2.850 | 5.60 | 23 |
| 7-5 | 2.962 | 2.86 | 3.40 | 23 |
| 8-5 | 3.022 | 2.955 | 2.20 | 23 |
| 9-5 | 3.023 | 3g | 0.70 | 23 |

a Unless otherwise stated, the melting phase transition temperature of paraffin is 60 oC. b 23min corresponds to the time it takes for the paraffin wax to melt completely during the leak test.

**Table S3** **Parameters of HP/CB-OPCMs sample.**

| **HP/CB-OPCMS a(g)** | **Sample quality before leakage quality(g)** | **Sample quality after leakage quality(g)** | **Leakage rate(%)** | **Time(min) b** |
| --- | --- | --- | --- | --- |
| 0.5/5-5 | 3.0 | 2.894 | 3.50 | 23 |
| 1.0/5-5 | 3.056 | 3.011 | 1.40 | 23 |
| 1.5/5-5 | 3.0170 | 2.9975 | 0.60 | 23 |
| 2.0/5-5 | 2.9977 | 2.9810 | 0.55 | 23 |

a Unless otherwise stated, the ratio of polymer synthesized by monomer is 8:2, and the melting phase transition temperature of paraffin is 60 o C. b 23min corresponds to the time it takes for the paraffin wax to melt completely during the leak test.

**Fig. S11 Leakage images of HP/CB-IPCMs.**


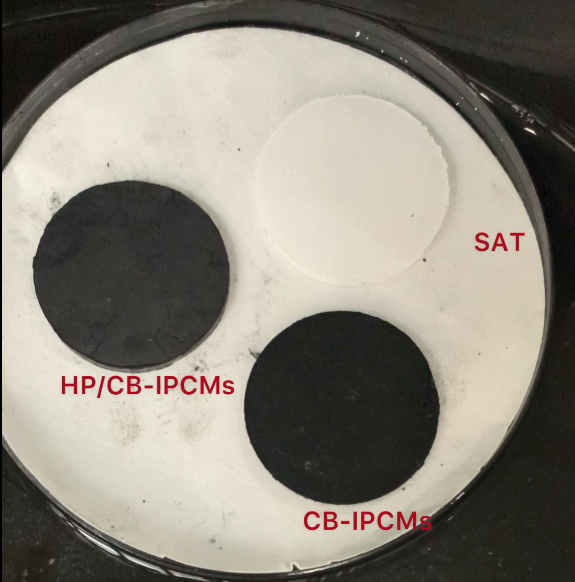

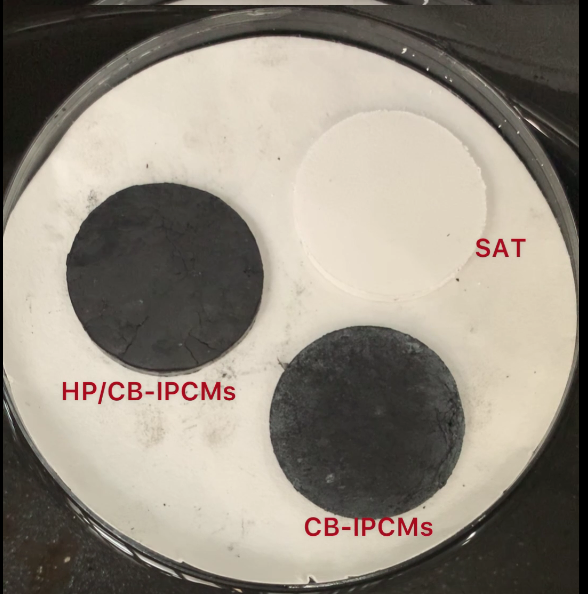


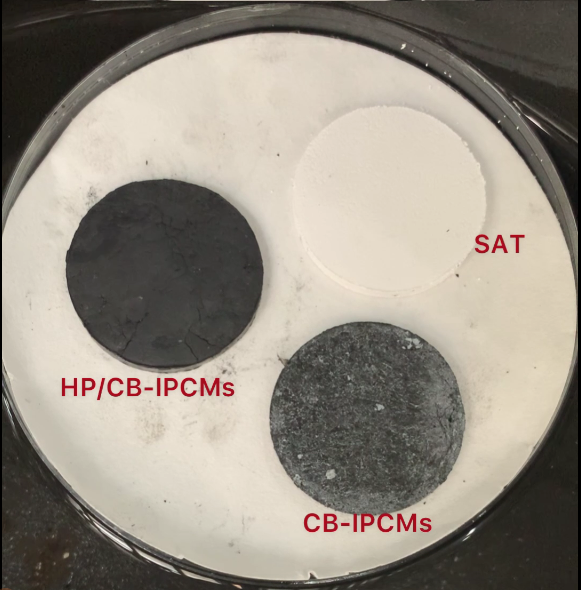

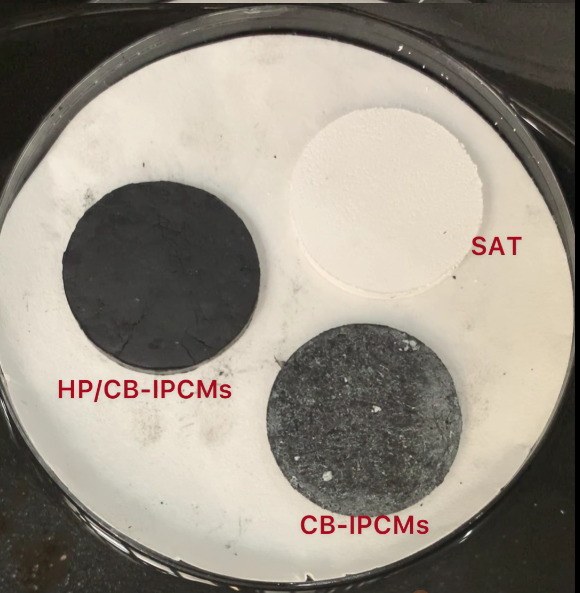


**Reference**

1. Yang, J.; Jia, Y. L.; Bing, N. C.; Wang, L. L.; Xie, H. Q.; Yu, W., Reduced graphene oxide and zirconium carbide co-modified melamine sponge/paraffin wax composites as new form-stable phase change materials for photothermal energy conversion and storage. *Appl. Therm. Eng.* **2019,** *163*, 9.

2. Liu, C. H.; Song, Y.; Xu, Z.; Zhao, J. T.; Rao, Z. H., Highly efficient thermal energy storage enabled by a hierarchical structured hypercrosslinked polymer/expanded graphite composite. *International Journal of Heat and Mass Transfer* **2020,** *148*, 11.

3. Liu, C. H.; Zong, J. H.; Zhang, J. H.; He, D. Q.; Guo, C. L.; Xu, B.; Rao, Z. H., Knitting aryl network polymers (KAPs)-embedded copper foam enables highly efficient thermal energy storage. *J. Mater. Chem. A* **2020,** *8* (30), 15177-15186.

4. Mishra, A. K.; Lahiri, B. B.; Philip, J., Carbon black nano particle loaded lauric acid-based form-stable phase change material with enhanced thermal conductivity and photo-thermal conversion for thermal energy storage. *Energy* **2020,** *191*, 15.

5. Du, X. S.; Zhou, M.; Deng, S.; Du, Z. L.; Cheng, X.; Wang, H. B., Poly(ethylene glycol)-grafted nanofibrillated cellulose/graphene hybrid aerogels supported phase change composites with superior energy storage capacity and solar-thermal conversion efficiency. *Cellulose* **2020,** *27* (8), 4679-4690.

6. Zhang, Y.; Wang, J. S.; Qiu, J. J.; Jin, X.; Umair, M. M.; Lu, R. W.; Zhang, S. F.; Tang, B. T., Ag-graphene/PEG composite phase change materials for enhancing solar-thermal energy conversion and storage capacity. *Applied Energy* **2019,** *237*, 83-90.

7. Du, X. S.; Xu, J. I.; Deng, S.; Du, Z. L.; Cheng, X.; Wang, H. B., Amino-Functionalized Single-Walled Carbon Nanotubes-Integrated Polyurethane Phase Change Composites with Superior Photothermal Conversion Efficiency and Thermal Conductivity. *Acs Sustainable Chemistry & Engineering* **2019,** *7* (21), 17682-17690.

8. Yang, L.; Yuan, Y. P.; Zhang, N.; Dong, Y. F.; Sun, Y. F.; Ji, W. H., Photo-to-thermal conversion and energy storage of lauric acid/expanded graphite composite phase change materials. *Int. J. Energy Res.* **2020,** *44* (11), 8555-8566.
